# Supplementary material for: Thymosin α1 reverses oncolytic adenovirus-induced M2 polarization of macrophages to improve antitumor immunity and therapeutic efficacy
Source: PubMed Central journal article supplement — Cell Rep Med. 2024 Oct 1;5(10):101751. doi: 10.1016/j.xcrm.2024.101751 (PMC11513825; doi:10.1016/j.xcrm.2024.101751), 2024-10-01
Supplement: mmc1.pdf [file mmc1.pdf]

**Cell Reports Medicine, Volume 5**

**Supplemental information**

**Thymosin  $\alpha$ 1 reverses oncolytic adenovirus-induced  
M2 polarization of macrophages to improve  
antitumor immunity and therapeutic efficacy**

**Kua Liu, Lingkai Kong, Huawei Cui, Louqian Zhang, Qilei Xin, Yan Zhuang, Ciliang Guo, Yongzhong Yao, Jinqiu Tao, Xiaosong Gu, Chunping Jiang, and Junhua Wu**

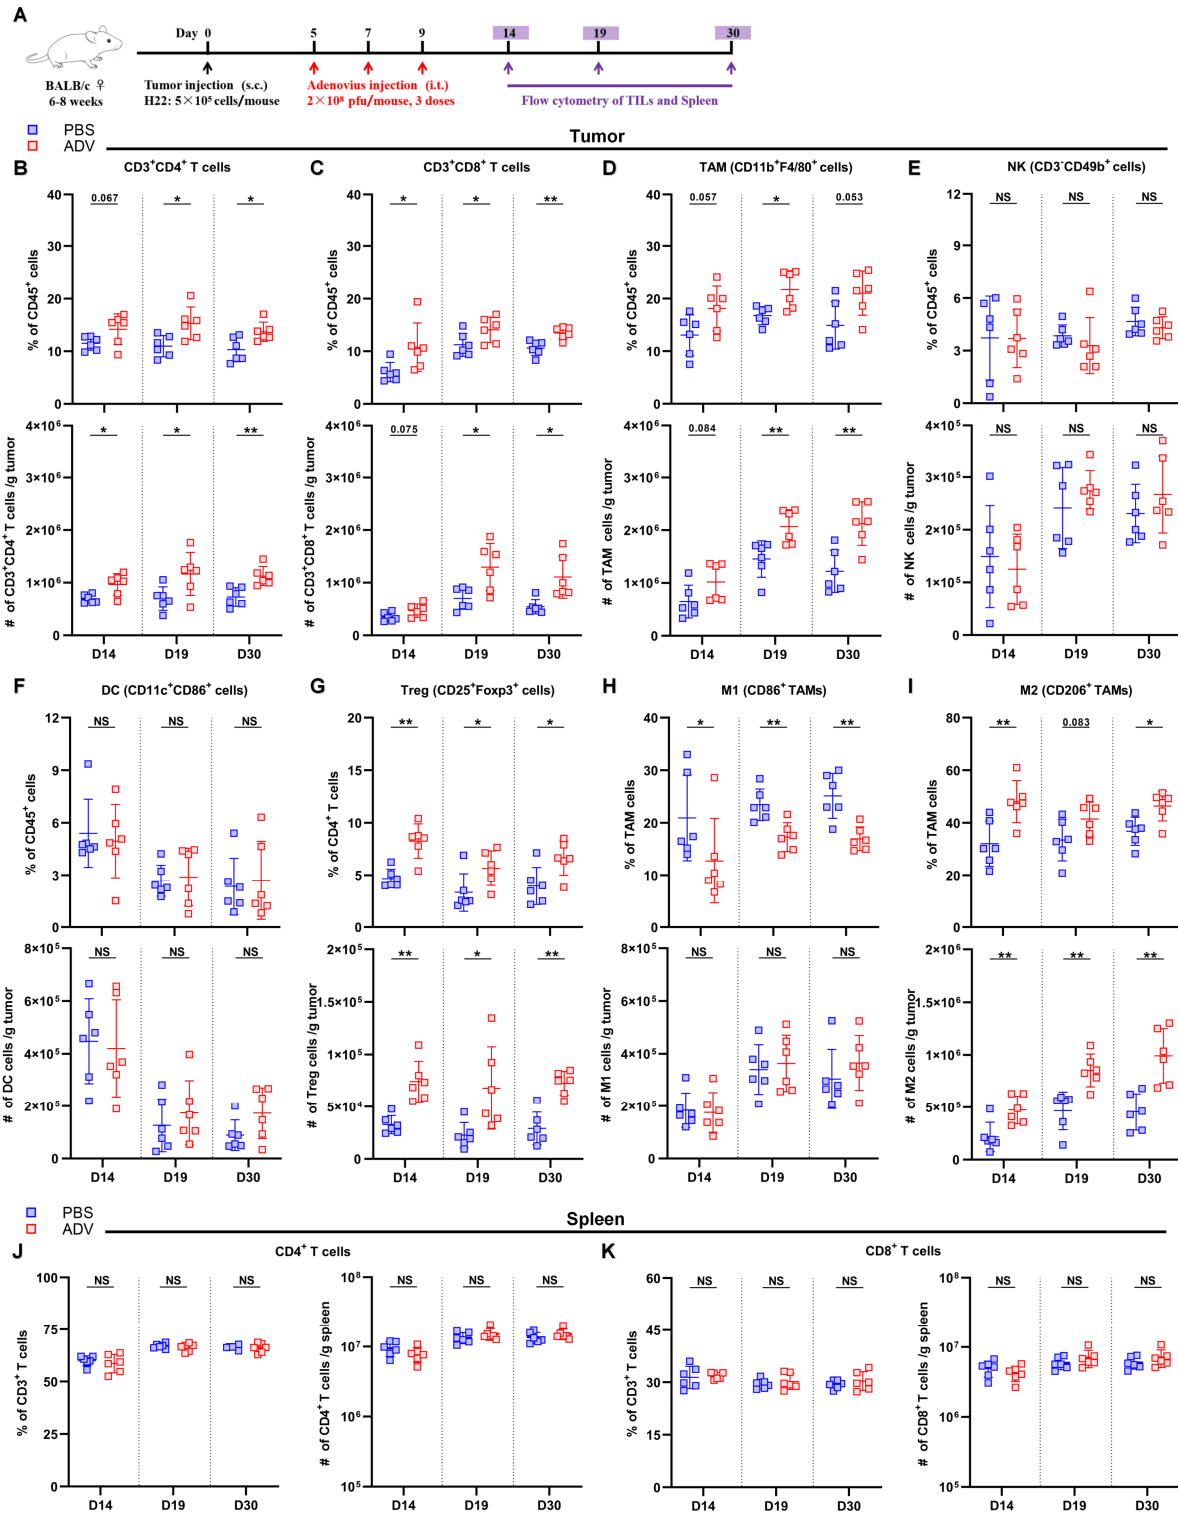

**Figure S1. ADV treatment effectively increased tumor immune infiltration while induced an immunosuppressive feedback loop in HCC model. Related to Figure 1.**

(A) Experimental schematic of mice from (Figures S1B-S1K): H22-tumor-bearing wild-type (WT) mice were administered ADV or vehicle control (PBS) starting on day 5 when the tumor volume reached approximately 50

to 100 mm<sup>3</sup>. Tumor-infiltrating leukocytes (TILs) from the tumor and spleen were assessed by flow cytometry (day 14, day 19, day 30; n=6 biological replicates); s.c., subcutaneous; i.t., intratumoral. **(B-I)** Percentages (top) and total cells normalized to g tumor tissue (bottom) of Tumor-infiltrating **(B)** CD3<sup>+</sup>CD4<sup>+</sup> T cells, **(C)** CD3<sup>+</sup>CD8<sup>+</sup> T cells, **(D)** CD11b<sup>+</sup>F4/80<sup>+</sup> macrophages, **(E)** CD3<sup>-</sup>CD49b<sup>+</sup> NK cells, **(F)** CD11c<sup>+</sup>CD86<sup>+</sup> DCs, **(G)** CD25<sup>+</sup>Foxp3<sup>+</sup> Treg cells, **(H)** “M1-like” macrophages, **(I)** “M2-like” macrophages within the TME of mice (n=6 biological replicates). **(J and K)** Percentages (left) and total cells normalized to g tumor tissue (right) of CD4<sup>+</sup> T cells **(J)** and CD8<sup>+</sup> T cells **(K)** within the spleens of mice (n=6 biological replicates). The data are shown as the means ± SD. NS, no significant difference; \*p<0.05, \*\*p<0.01.

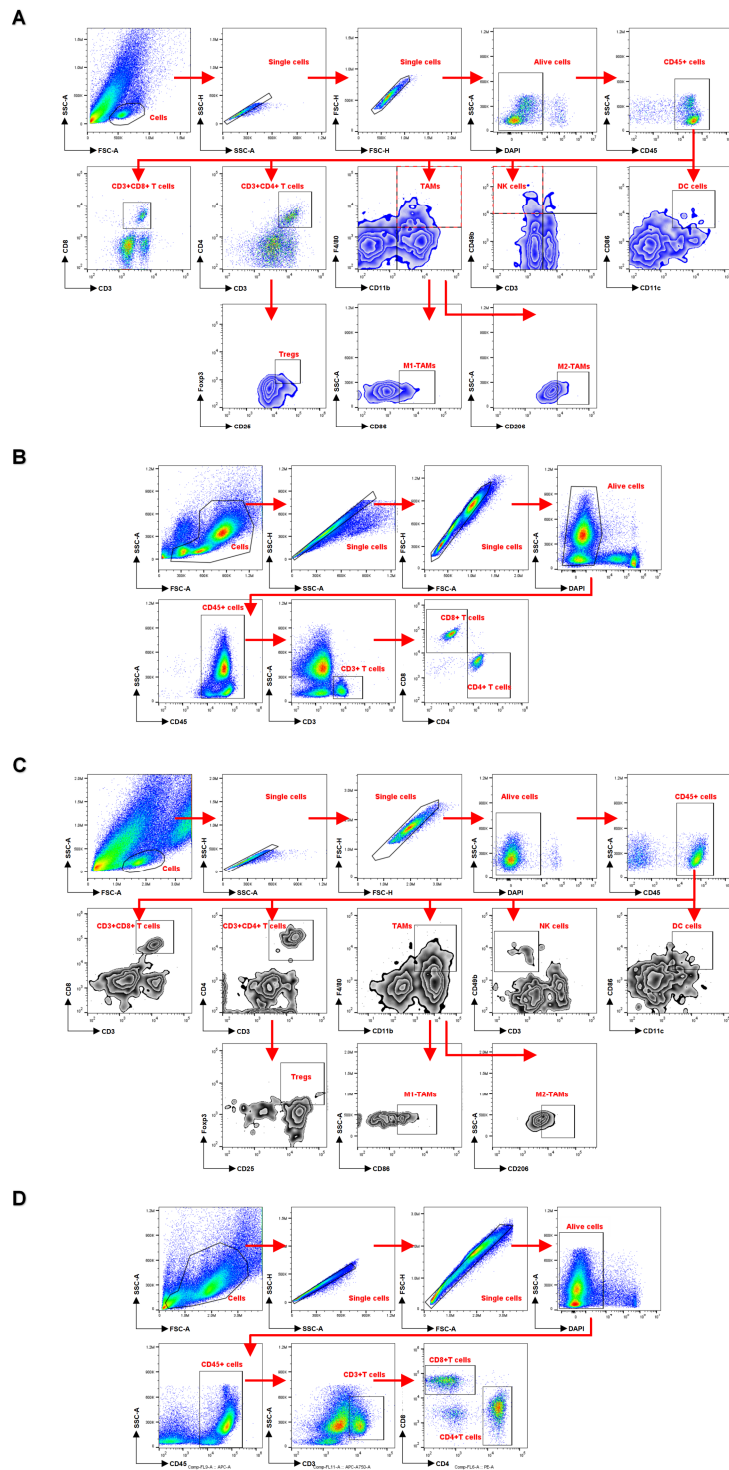

**Figure S2. Flow cytometry gating strategy for the identification of immune cells within the tumor and spleen. Related to Figure 1 and Figure S1.**

**(A)** Flow cytometry gating strategy for the identification of immune cells within the tumor in 4T1 model. **(B)**

Flow cytometry gating strategy for the identification of immune cells within the spleen in 4T1 model. **(C)** Flow

cytometry gating strategy for the identification of immune cells within the tumor in H22 model. **(D)** Flow

cytometry gating strategy for the identification of immune cells within the spleen in H22 model.

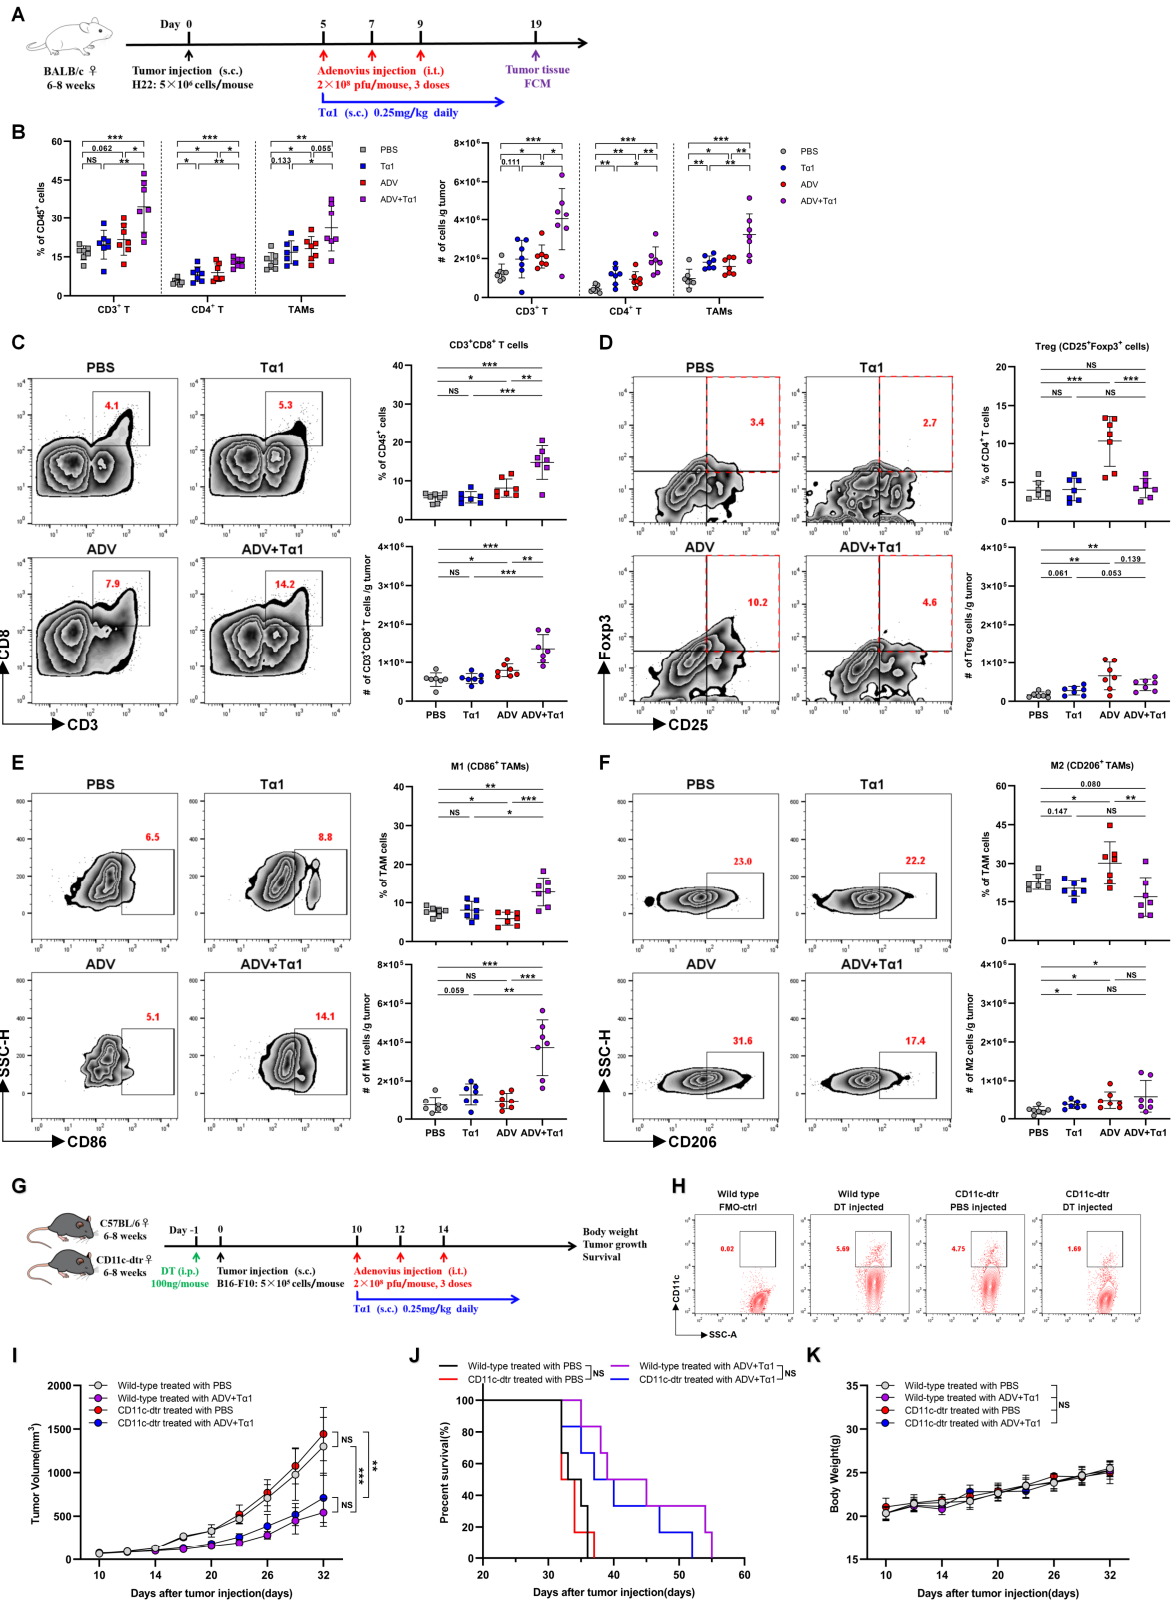

**Figure S3. Ta1 intervention can reprogram the TME during ADV treatment. Related to Figure 3.**

(A) Schematic representation of experimental design and treatment timeline. Wild-type mice were injected subcutaneously with  $5 \times 10^6$  H22 cells. When the tumor volume reached approximately 50 to 100  $\text{mm}^3$ , the mice

were randomly divided into different groups and treated with an intratumoral injection of 0.1 mL of PBS or ADV ( $2 \times 10^8$  PFUs) every 2 days for a total of three times. T $\alpha$ 1 (0.25 mg/kg) was injected subcutaneously into the peritumoral site once daily starting with the first dose of ADV. Tumor-infiltrating leukocytes (TILs) from the tumor were assessed by flow cytometry (day 19; n=7 biological replicates); s.c., subcutaneous; i.t., intratumoral.

**(B)** Percentages (left) and total cells normalized to g tumor tissue (right) of CD3<sup>+</sup> T cells, CD4<sup>+</sup> T cells and TAMs within the TME of mice (n=6 biological replicates). **(C-F)** Representative plots (left), percentages (top) and total cells normalized to g tumor tissue (bottom) of Tumor-infiltrating **(C)** CD3<sup>+</sup>CD8<sup>+</sup> T cells, **(D)** CD25<sup>+</sup>Foxp3<sup>+</sup> Treg cells, **(E)** “M1-like” macrophages and **(F)** “M2-like” macrophages within the TME of mice (n=6 biological replicates). **(G-K)** Wild-type (WT) mice and CD11c-dtr mice were administered diphtheria toxin the day before tumor injection. B16 tumor-bearing mice were administered different immunotherapies starting on day 10 when the tumor volume reached approximately 50 to 100 mm<sup>3</sup> (n=6 biological replicates). s.c., subcutaneous; i.t., intra-tumoral; i.p., intra-peritoneal. **(G)** Schematic representation of experimental design and treatment timeline. **(H)** Tumor tissue samples of B16 tumor-bearing mice were collected on day 10, and flow cytometry confirmed the depletion effect of diphtheria toxin on CD11c-dtr mice. **(I)** Tumor growth. **(J)** Survival. **(K)** Body weight. The data are shown as the means  $\pm$  SD. NS, no significant difference; \*p<0.05, \*\*p<0.01, \*\*\*p<0.001.

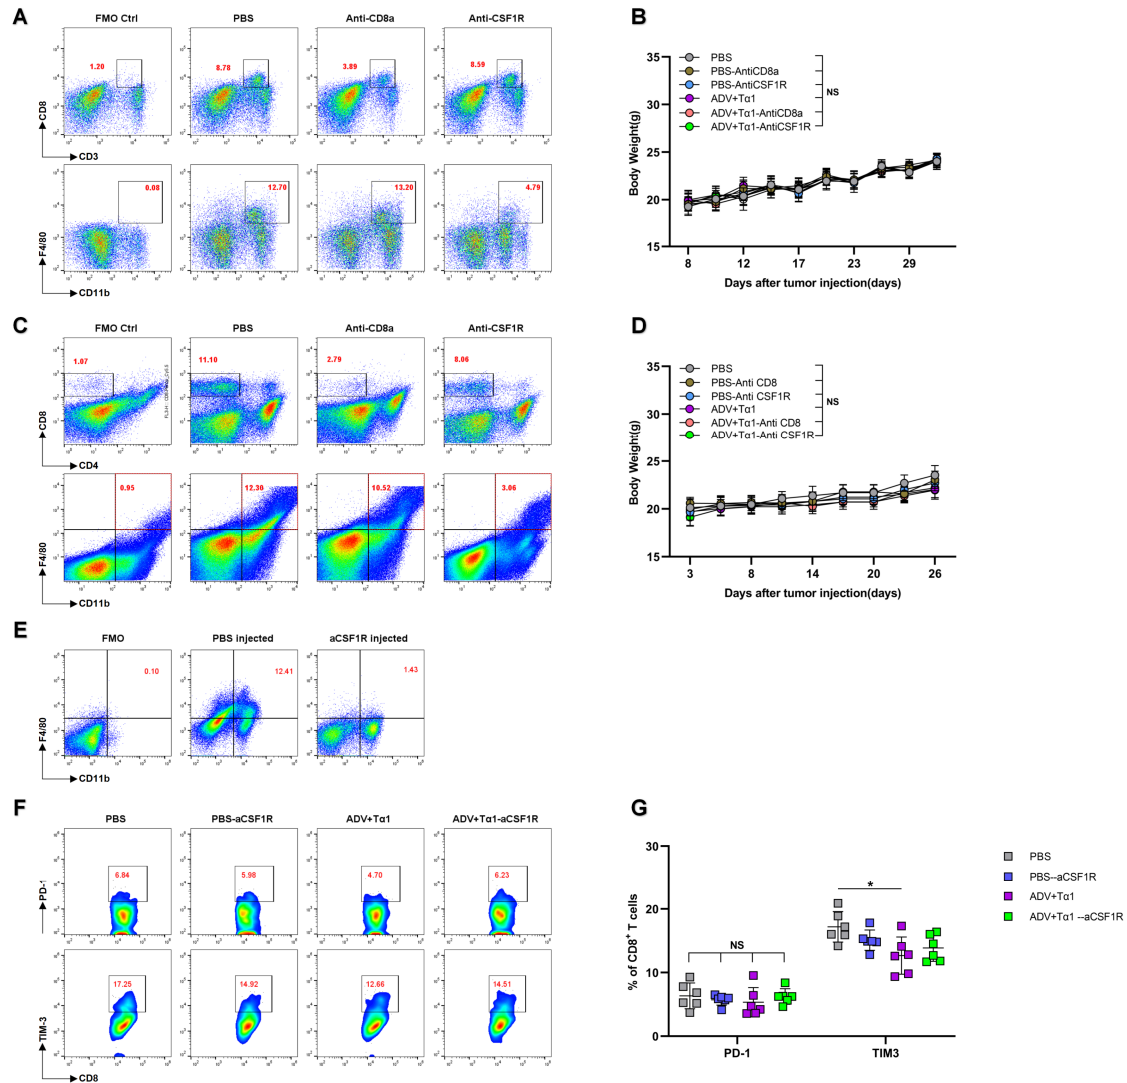

**Figure S4. The antitumor activity of ADV combined with Ta1 was mediated by macrophages and CD8<sup>+</sup> T cells. Related to Figure 4.**

(A) Tumor tissue samples of 4T1 tumor-bearing mice (from Figure 4B) were collected on day 15, and flow cytometry confirmed the anti-CSF1R and anti-CD8a depletion effects. (B) Body weight of 4T1 tumor-bearing mice (from Figures 4B and 4C) was monitored every 2 or 3 days (n=10 biological replicates). (C) Tumor tissue samples of H22-bearing mice (from Figure 4C) were collected on day 15, and flow cytometry confirmed the anti-CSF1R and anti-CD8a depletion effects. (D) Body weight of H22-bearing mice (from Figures 4C and 4D) was monitored every 2 or 3 days in the H22 model (n=10 biological replicates). (E) Tumor tissue samples of 4T1-bearing mice (from Figure 4J) were collected on day 15, and flow cytometry confirmed the anti-CSF1R



depletion effect. **(F and G)** Representative plots **(F)** and percentages **(G)** of PD1<sup>+</sup>CD8<sup>+</sup>T cells and TIM3<sup>+</sup>CD8<sup>+</sup>T cells within the TME of mice (from Figure 4J; n=6 biological replicates). The data are shown as the means  $\pm$  SD. NS, no significant difference; \*p<0.05.

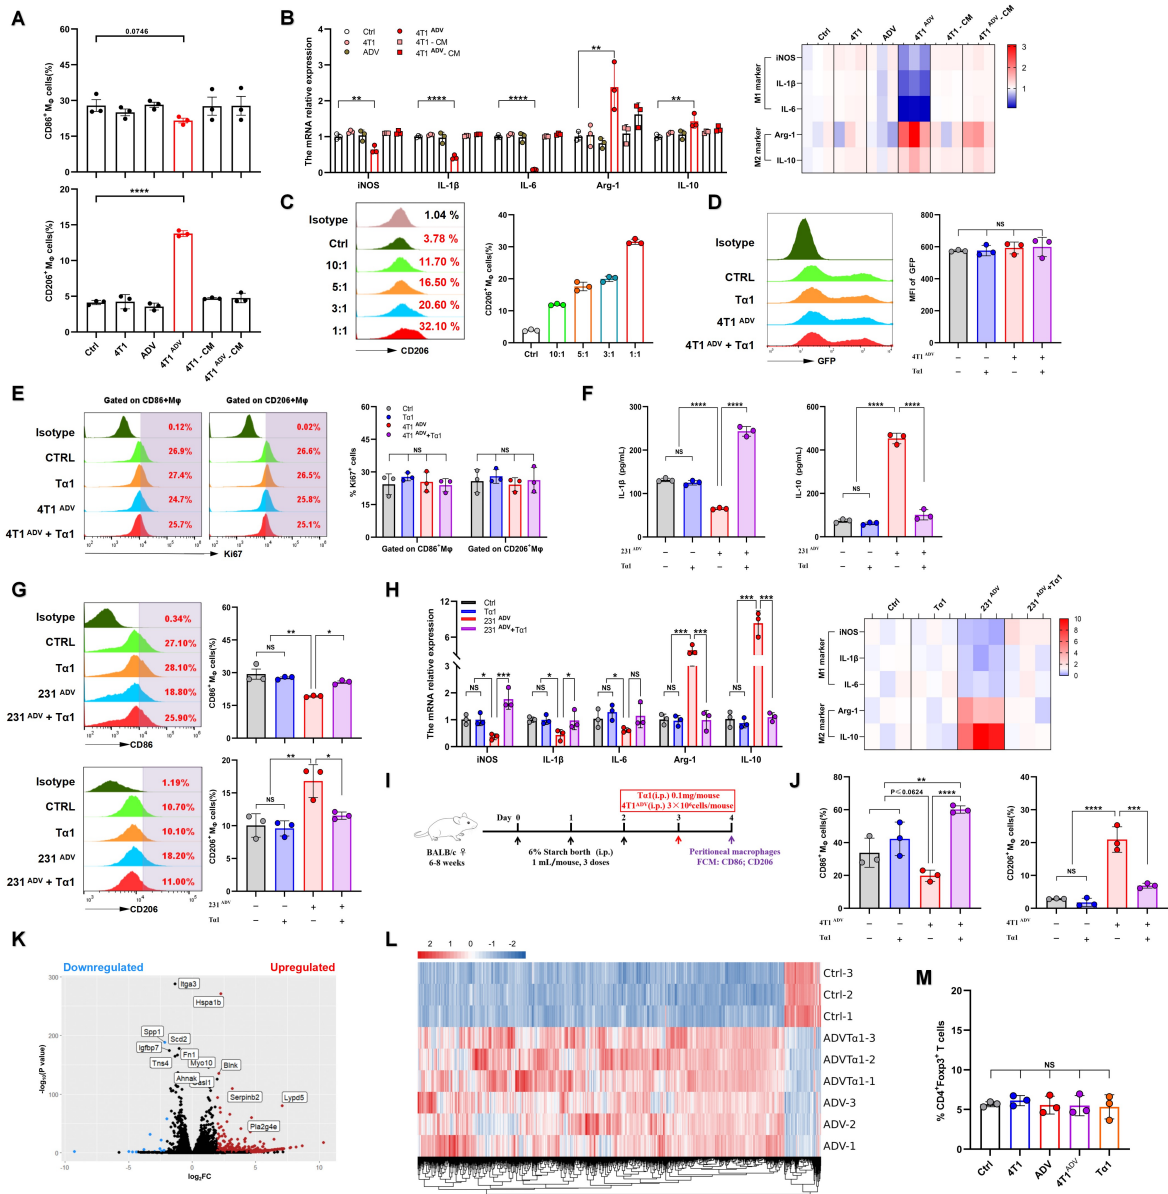

**Figure S5. Ta1 reversed the phenotype of macrophages induced by ADV-infected tumor cells. Related to Figure 5.**

**(A and B)** Macrophages (RAW264.7 cells) were cocultured with 4T1 cells, ADV, ADV-infected 4T1 cells (4T1<sup>ADV</sup> cells), conditioned medium obtained from 4T1 cell cultures (4T1-CM), or 4T1<sup>ADV</sup>-CM, followed by analysis of macrophage polarization (n=3 biological replicates). **(A)** Expression of CD86 and CD206 was measured by FCM in macrophages. **(B)** Expression of iNOS, IL-1 $\beta$ , IL-6, Arg-1 and IL-10 was measured by qPCR in macrophages (n=3 biological replicates and 3 technical replicates), and the mRNA expression level of

iNOS, IL-1 $\beta$ , IL-6, Arg-1 and IL-10 was showed as heat map. **(C)** Expression of CD206 was measured by FCM in macrophages stimulated by 4T1<sup>ADV</sup> cells at different E:T ratios (n=3 biological replicates). **(D)** After different interventions, macrophages (from Figure 5A) were cocultured with GFP+ *Escherichia coli* for 3 hours. Then, the EGFP levels in macrophages were measured by flow cytometry to assess phagocytosis efficiency. Macrophages from different intervention groups were mixed together to be used as a control to exclude interference from adenovirus GFP fluorescence (n=3 biological replicates). **(E)** Expression of Ki67 was measured by FCM in CD86<sup>+</sup> macrophages or CD206<sup>+</sup> macrophages (from Figure 5C). **(F-H)** Macrophages (THP-1 cells) were cocultured with stimulated by different interventions, followed by analysis of macrophage polarization (n=3 biological replicates). **(F)** IL-1 $\beta$  and IL-10 concentrations in the supernatants were measured by ELISA. **(G)** The expression of CD86 (top) and CD206 (bottom) in macrophages was measured by FCM. **(H)** The expression of iNOS, IL-1 $\beta$ , IL-6, Arg-1 and IL-10 in macrophages was measured by qPCR, and the mRNA expression levels of iNOS, IL-1 $\beta$ , IL-6, Arg-1 and IL-10 are shown as heatmaps. **(I and J)** BALB/c mice were intraperitoneally injected with 1 mL of 6% starch broth once a day for three days to recruit macrophages. On day 4, PBS, T $\alpha$ 1, 4T1<sup>ADV</sup> cells, or 4T1<sup>ADV</sup> & T $\alpha$ 1 were intraperitoneally injected into mice. On day 5, the mice were euthanized, and the peritoneal macrophages were harvested. **(I)** Schematic representation of experimental design. **(J)** Expression of CD86 and CD206 in peritoneal macrophages was measured by FCM (n=3 biological replicates). i.p., intraperitoneal. **(K)** Volcano plot showing the DEGs between ADV-treated 4T1 cells and vehicle-treated 4T1 cells. DEGs with an absolute log-transformed fold change >1 and a P value <0.05 (determined by two-sided Wilcoxon rank-sum test) were defined as significant. **(L)** Heatmap of DEGs in all 4T1 cell groups. **(M)** CD4<sup>+</sup> T cells from mouse spleens were cocultured with 4T1 cells, ADV, or ADV-infected 4T1 cells (4T1<sup>ADV</sup> cells) or stimulated with T $\alpha$ 1. The expression of Foxp3 in CD4<sup>+</sup> T cells was measured by FCM (n=3 biological replicates). The data are shown as the means  $\pm$  SD. ns, no significant difference; \*p<0.05,

\*\*p<0.01, \*\*\*p<0.001, \*\*\*\*p<0.0001.

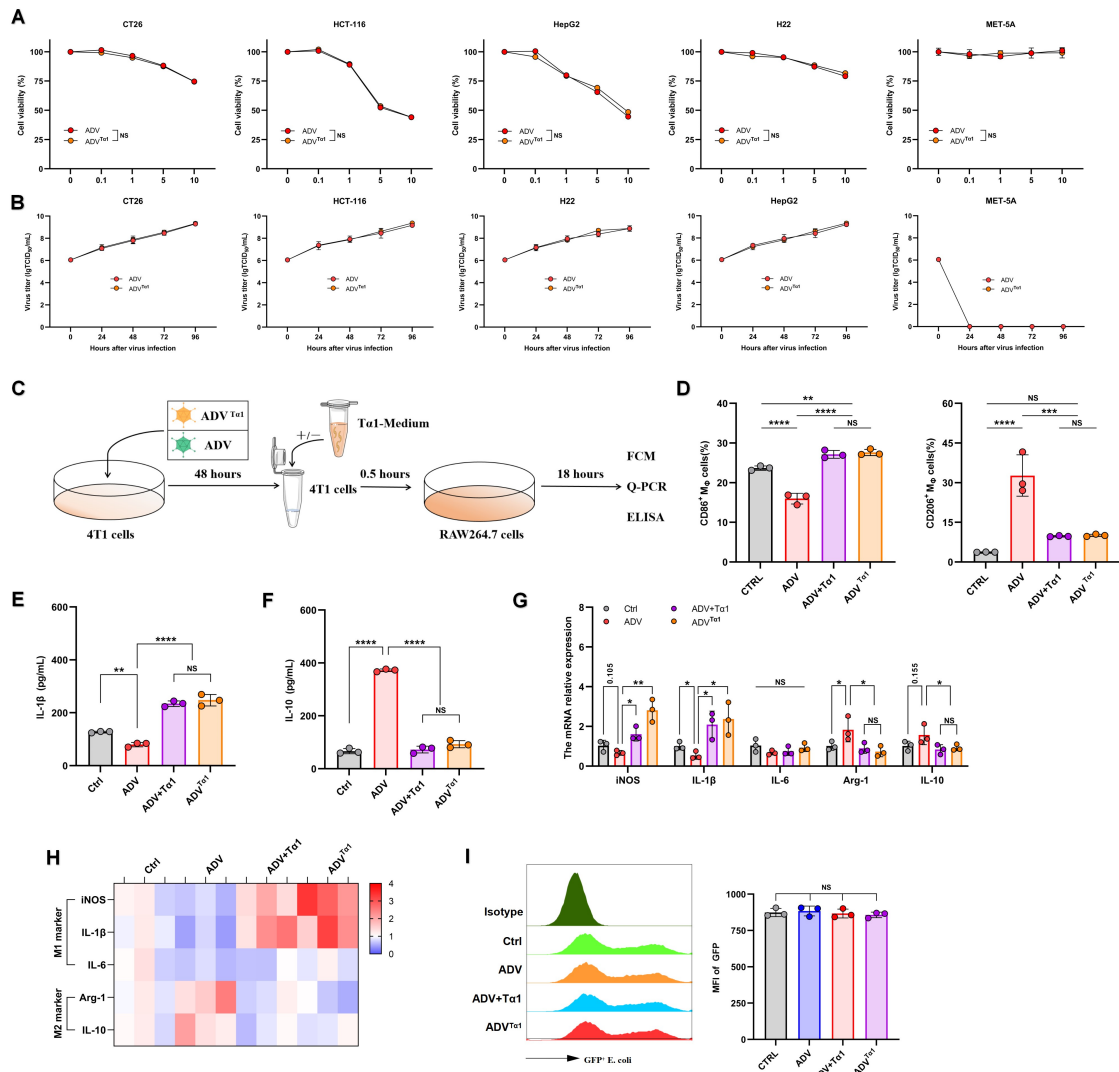

**Figure S6.  $ADV^{T\alpha 1}$  has replication and oncolytic efficacy similar to that of ADV. Related to Figure 6.**

(A) CT26 cells, HCT116 cells, HepG2 cells, H22 cells and MET-5A cells were infected with  $ADV^{T\alpha 1}$  or ADV at different MOIs, and cell viability was measured 48 h later by CCK-8 assay (n=3 biological replicates). (B) CT26 cells, HCT116 cells, HepG2 cells, H22 cells and MET-5A cells were infected with  $ADV^{T\alpha 1}$  or ADV at an MOI of 1. The virus titers were measured by TCID<sub>50</sub> assay at different time points after infection (n=3 biological replicates). (C-H) Macrophages (RAW264.7 cells) were cocultured with 4T1<sup>ADV</sup> (ADV), 4T1<sup>ADV</sup> cells with  $T\alpha 1$  (ADV +  $T\alpha 1$ ), or  $ADV^{T\alpha 1}$ -infected 4T1 cells ( $ADV^{T\alpha 1}$ ), followed by analysis of macrophage polarization (n=3 biological replicates). (C) Schematic representation of experimental design. (D) The expression of CD86 (left) and CD206 (right) in macrophages was measured by FCM. (E) IL-1 $\beta$  and (F) IL-10 (right) concentrations in the

supernatants were measured by ELISA. **(G)** The expression of iNOS, IL-1 $\beta$ , IL-6, Arg-1 and IL-10 in macrophages was measured by qPCR (n=3 biological replicates and 3 technical replicates). **(H)** The mRNA expression levels of iNOS, IL-1 $\beta$ , IL-6, Arg-1 and IL-10 (Figure S6G) are shown as heatmaps. **(I)** After different interventions, macrophages (from Figure 6G) were cocultured with GFP+ *Escherichia coli* for 3 hours. Then, the EGFP levels in the macrophages were measured by flow cytometry to assess the phagocytosis efficiency. Macrophages from different intervention groups were mixed together to be used as a control to exclude interference from adenovirus GFP fluorescence (n=3 biological replicates). The data are shown as the means  $\pm$  SD. NS, no significant difference; \*p<0.05, \*\*p<0.01, \*\*\*p<0.001, \*\*\*\*p<0.0001.

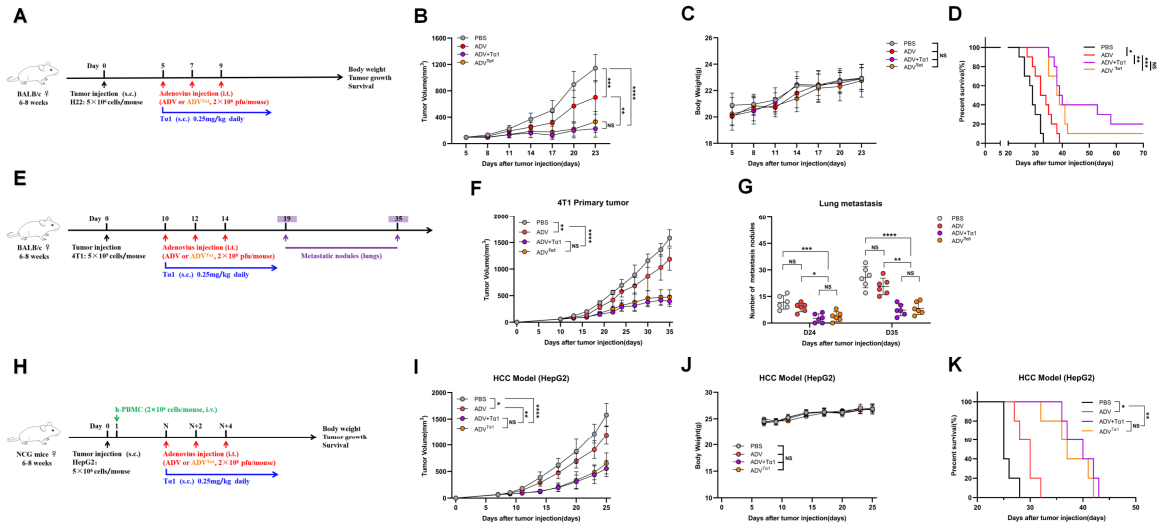

**Figure S7. ADV<sup>Tal</sup> is superior to ADV in producing a better antitumor immune response. Related to**

**Figure 7.**

(A-D) H22-tumor-bearing wild-type (WT) mice were administered different immunotherapies or vehicle control (PBS) starting on day 5 when the tumor volume reached approximately 50 to 100 mm<sup>3</sup>; s.c., subcutaneous; i.t., intra-tumoral. (A) Schematic representation of experimental design and treatment timeline. (B) Tumor growth. (C) Body weight. (D) Survival (n=10 biological replicates). (E-G) 4T1 cells were injected into the fourth mammary fat pads of NCG mice, and these 4T1-bearing mice were administered different immunotherapies starting on day 10; s.c., subcutaneous; i.t., intratumoral. (E) Schematic representation of experimental design and treatment timeline. Primary tumor growth (F) and metastasis to the lung (G) in 4T1 tumor-bearing mice after immunotherapies (day 19, 24; n=6 biological replicates). (H-K) Tumor-bearing NCG mice were intravenously injected with human peripheral blood mononuclear cells on day 1, and then PBMC-humanized mice were administered different immunotherapies; s.c., subcutaneous; i.t., intra-tumoral; i.v., intravenous. (H) Schematic representation of experimental design and treatment timeline. (I) Tumor growth. (J) Body weight. (K) Survival (n=5 biological replicates). The data are shown as the means  $\pm$  SD. NS, no significant difference;

\*p<0.05, \*\*p<0.01, \*\*\*p<0.001, \*\*\*\*p<0.0001.

| Target Name   | Forward primer (5' → 3') | Reverse primer (5' → 3')  |
|---------------|--------------------------|---------------------------|
| mArg-1        | CAGATATGCAGGGAGTCACC     | CAGAAGAATGGAAGAGTCAG      |
| miNOS         | CCACCCGAGCTCCTGGAAC      | CCCTCCTGATCTTGTGTTGGA     |
| mIL-10        | GCTCTTACTGACTGGCATGAG    | CGCAGCTCTAGGAGCATGTG      |
| mIL-6         | ACAAAGCCAGAGTCCTCAGAGAG  | TTGGATGGTCTTGGTCCTTAGCCA  |
| mIL-1 $\beta$ | TCTTTGAAGTTGACGGACCC     | TGAGTGATACTGCCTGCCTG      |
| mGAPDH        | AGGTCGGTGTGAACGGATTTG    | TGTAGACCATGTAGTTGAGGTCA   |
| hArg-1        | TTGGCTTGAGAGACGTGGAC     | ACACTTGCTTCTCTATTACCTCAGA |
| hiNOS         | ATGGAACATCCCAAATACGA     | GTCGTAGAGGACCACTTTGT      |
| hIL-10        | ACCACGCTTTCTAGCTGTTGA    | GCTCCCTGGTTTCTCTTCCTA     |
| hIL-6         | TGCCTCTTTGCTGCTTTCACA    | TCGGTCCAGTTGCCTTCTCCC     |
| hIL-1 $\beta$ | GGATATGGAGCAACAAGTGG     | ATGTACCAGTTGGGGAAGT       |
| hGAPDH        | GGACCTGACCTGCCGTCTAG     | GTAGCCCAGGATGCCCTTGA      |

**Table S1: Primers used in Real-time quantitative PCR analyses. Related to Figures 5, 6, S5, and S6.**
